# Supplementary material for: A heuristic feature cluster search algorithm for precise functional brain mapping
Source: bioRxiv or medRxiv preprint supplement (doi:10.1101/518480), 2019-01-12
Supplement: Supplementary file [file media-1.pdf]

# Supporting information

January 12, 2019

## **Comparison of Prediction Results**

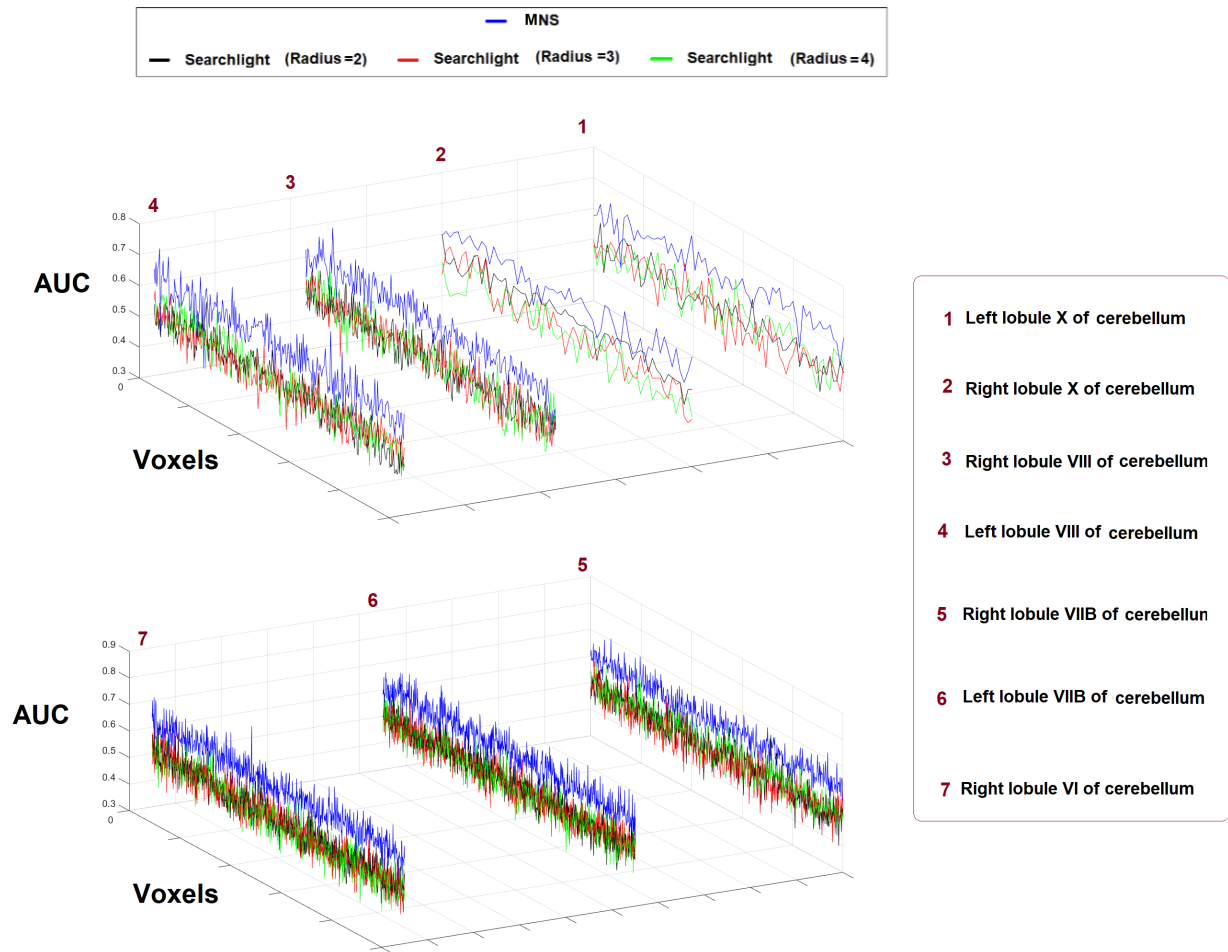

Figure 1: Test AUC for classification with decision tree of the MNS algorithm and the searchlight method with different search radii for different cerebellar regions per AAL using the ABIDE dataset.
